# Supplementary material
Source: PubMed Central journal article supplement (PMC6249606)
Supplement: jiy422_suppl_figure_1.pdf [file jiy422_suppl_figure_1.pdf]

# Supplemental Figure 1

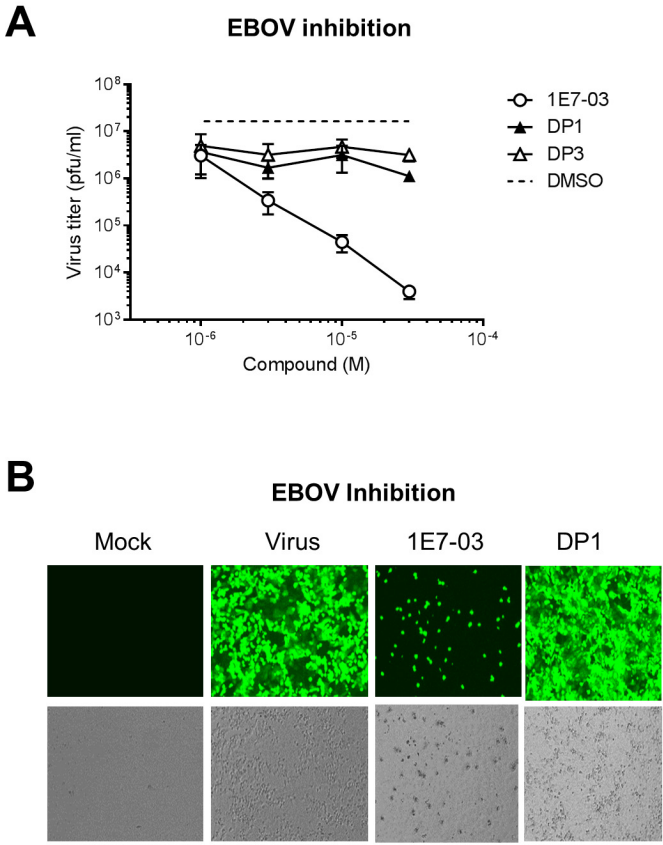

**EBOV Inhibition by 1E7-03, DP1 and DP3 metabolites.** Vero-E6 monolayers were treated in triplicates with the indicated concentrations of the compounds, then infected with EBOV-eGFP and supernatants were collected at 48 hours post infection. (A) Virus titer was measured, and EBOV-eGFP titers  $\pm$  SD are shown. (B) eGFP fluorescence (upper panel) and monolayers were photographed at 48 hrs p.i.
