# Supplementary material
Source: PubMed Central journal article supplement (PMC6249606)
Supplement: jiy422_suppl_figure_3.pdf [file jiy422_suppl_figure_3.pdf]

**Supplemental Figure 3. (A)** Structures of top 6 EBOV inhibitory compounds with Z-scores of 0.5 or above and toxicity below 10%. **(B)** Antiviral effect, Z scores and percent toxicity for the compounds from panel A. Compounds were added at 10  $\mu$ M concentration.

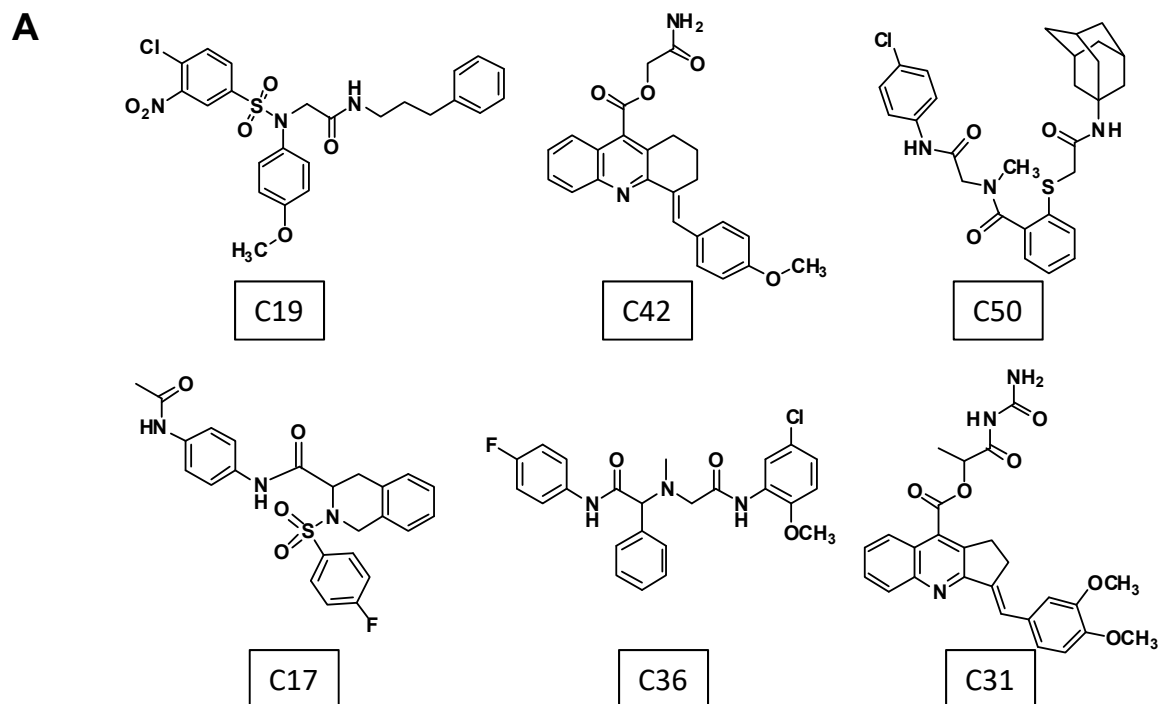

**B**

| Compound | % of infection remained | Z-factor | % toxicity |
|----------|-------------------------|----------|------------|
| C19      | 14                      | 0.5      | 0          |
| C42      | 30                      | 0.5      | 0          |
| C50      | 8                       | 0.5      | 0          |
| C17      | 5                       | 0.7      | 4.1        |
| C36      | 13                      | 0.5      | 5.76       |
| C31      | 8                       | 0.6      | 9.64       |
