# Supplementary material
Source: PubMed Central journal article supplement (PMC6249606)
Supplement: jiy422_suppl_figure_4.pdf [file jiy422_suppl_figure_4.pdf]

# Supplemental Figure 4

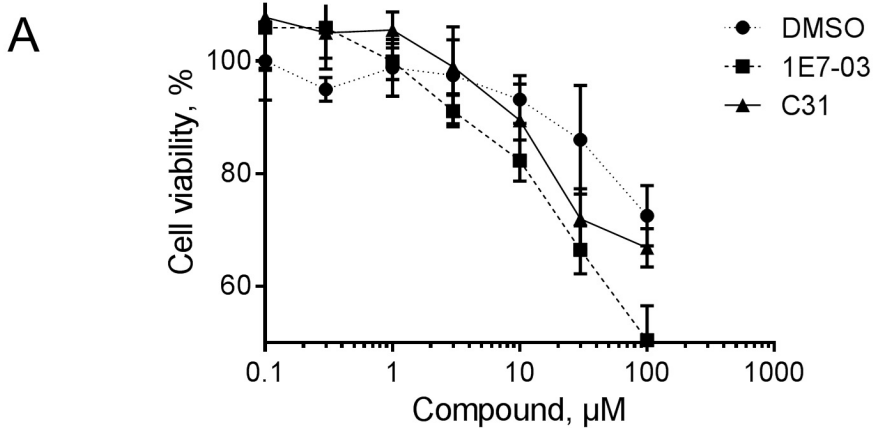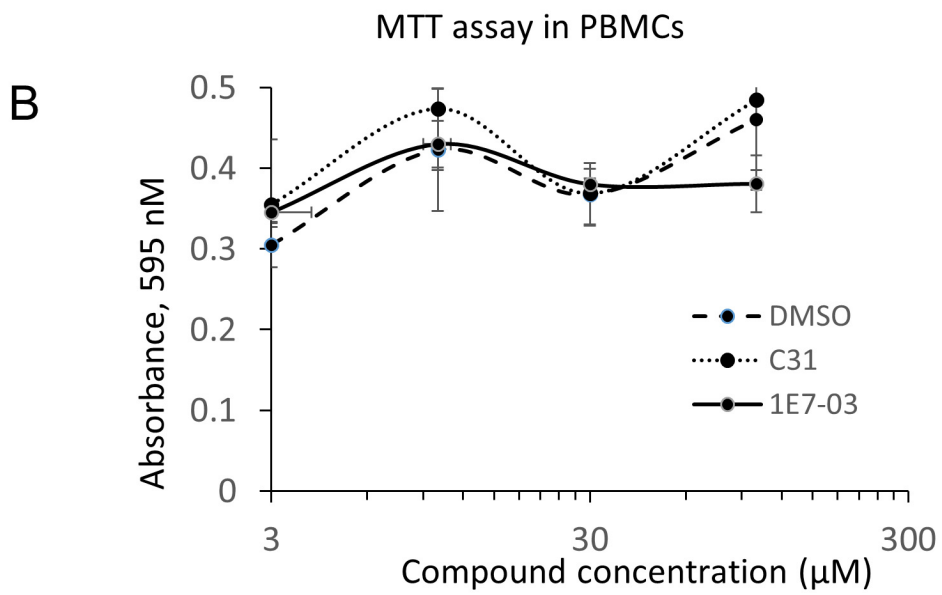

**Cell proliferation assay (MTT). 293T cells (A) and PBMCs (B)** at 50% of confluence were treated overnight with compound (C31, 1E7-03 or DMSO only) concentrations at 3, 10, 30 and 100  $\mu\text{M}$  and compounds toxicity was measured using 3-(4,5-dimethylthiazol-2-yl)-2,5-diphenyltetrazolium bromide (MTT) dye conversion assay, which has a stable end point. The MTT reactions were analyzed at a wavelength of 595 nm.
