# Supplementary material
Source: PubMed Central journal article supplement (PMC6249606)

**Supplemental Figure 5. C31 compound forms crystals at high concentration.** 293T cells grown in 24 –well plates were treated with 10  $\mu$ M C31 or DMSO as a vehicle control for 24 hrs. The cells were photographed on Olympus IX51 using a blue filter for green fluorescence and either 100x or 400 x magnification. Phase contrast, green fluorescence and combined images are shown.

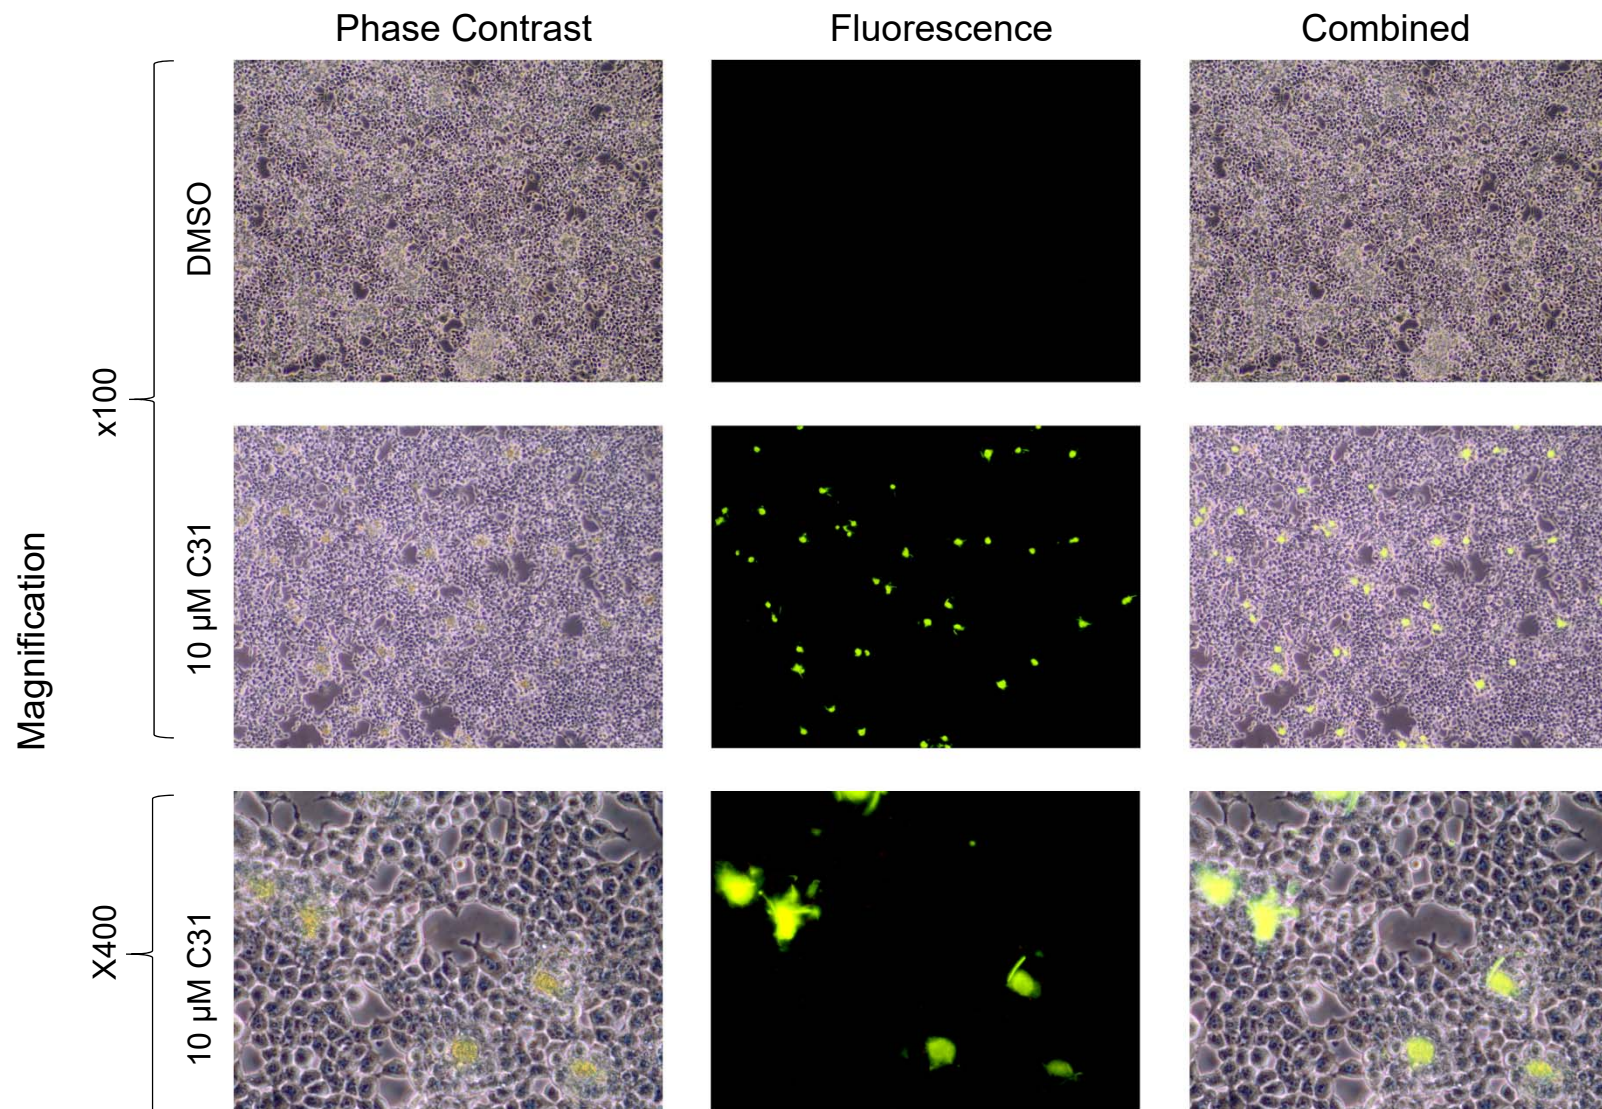

Supplement: jiy422_suppl_figure_5.pdf [file jiy422_suppl_figure_5.pdf]
