# Supplementary material
Source: PubMed Central journal article supplement (PMC6249606)
Supplement: jiy422_suppl_figure_6.pdf [file jiy422_suppl_figure_6.pdf]

Supplemental Figure 6

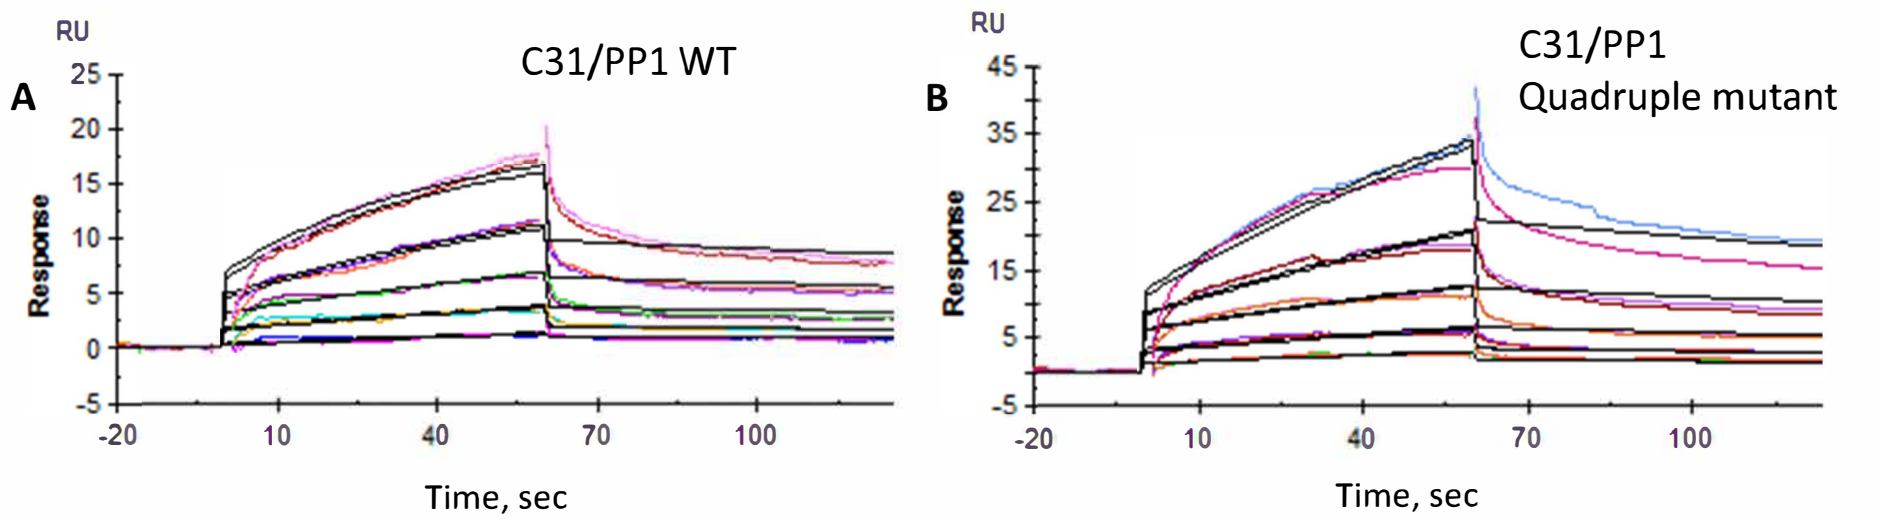

| $k_a$ (1/Ms) | $k_d$ (1/s) | $K_D$ (M) | $R_{max}$ (RU) | $\chi^2$ (RU <sup>2</sup> ) | U value |
|--------------|-------------|-----------|----------------|-----------------------------|---------|
| 1125         | 0.002120    | 1.884E-6  | 13.96          | 0.254                       | 5       |

| $k_a$ (1/Ms) | $k_d$ (1/s) | $K_D$ (M) | $R_{max}$ (RU) | $\chi^2$ (RU <sup>2</sup> ) | U value |
|--------------|-------------|-----------|----------------|-----------------------------|---------|
| 379.1        | 0.003037    | 8.012E-6  | 66.30          | 1.50                        | 20      |

**PP1 binding of C31 to WT and C-groove mutated PP1.** Binding of C31 to recombinant PP1 was measured by surface plasmon resonance. **(A)** Raw data showing binding of C31 to WT PP1 and **(B)** shows binding of C31 to Y70W, L73Y, G274E, A299E (quadruple mutant of C-groove region) PP1. X axis represents time in seconds and Y axis represents changes in total mass on microchip surface, which was expressed as resonance units. A positive deflection indicated binding of C31 to PP1 immobilized on a NTA microchip surface. Each line represents a different concentration of C31(0-40  $\mu$ M). Each concentration was run two times. The equilibrium dissociation constants ( $K_D$ ) were calculated based on a 1:1 binding model.
