# Supplementary material
Source: PubMed Central journal article supplement (PMC6249606)
Supplement: jiy422_suppl_figure_7.pdf [file jiy422_suppl_figure_7.pdf]

# Supplemental Figure 7

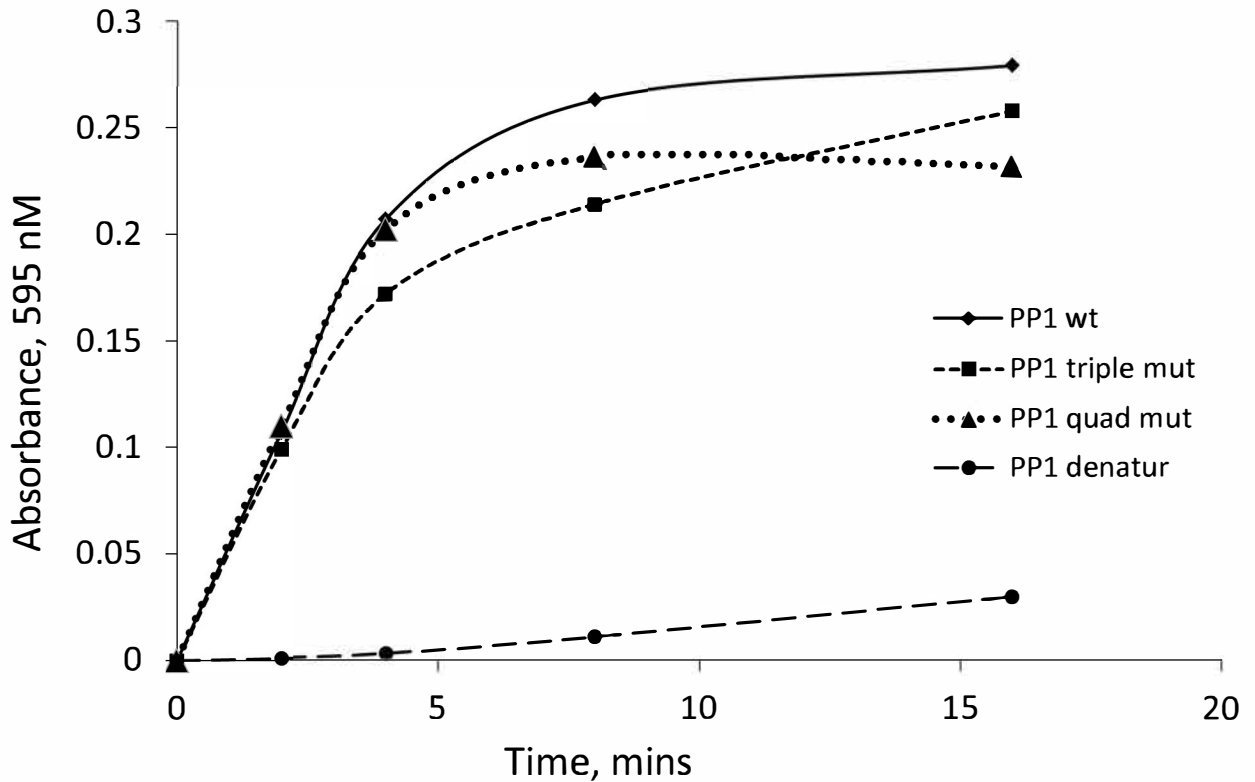

**Phosphatase activity assay.** Two of each mutant and wild type recombinant PP1 activity were measured using malachite green assay (detection of free phosphate released from KT(pT)IRR peptide (Upstate, Lake Placid, NY)). Procedure is described in supplemental methods. Activities of recombinant PP1 wt, PP1 triple mutant, PP1 quadruple mutant and denatured PP1 wt were measured in duplicates. Graph is built in Microsoft Excel.
