# Supplementary material
Source: PubMed Central journal article supplement (PMC6249606)
Supplement: jiy422_suppl_table_1.pdf [file jiy422_suppl_table_1.pdf]

## Supplemental Table 1

Library of 72 unique compounds, analogues of 1E7-03.

| ID  | Enamine ID | MW, g/mol | ID  | Enamine ID | MW, g/mol | ID   | Enamine ID | MW, g/mol |
|-----|------------|-----------|-----|------------|-----------|------|------------|-----------|
| C1  | T0519-1220 | 418.5     | C25 | T5216417   | 499.6     | C49  | T5481237   | 485.6     |
| C2  | T5254769   | 405.4     | C26 | T5219456   | 460.6     | C50  | T5498680   | 526.1     |
| C3  | T5337606   | 493.5     | C27 | T5227431   | 505.5     | C51  | T5510956   | 495       |
| C4  | T5374974   | 447.4     | C28 | T5229576   | 472.5     | C52  | T5549558   | 465.6     |
| C5  | T5381062   | 450.6     | C29 | T5230167   | 338.4     | C53  | T5551920   | 493.6     |
| C6  | T5399927   | 392.5     | C30 | T5251163   | 537       | C54  | T5557179   | 475       |
| C7  | T5400634   | 430.5     | C31 | T5251792   | 475.5     | C55  | T5574653   | 489.6     |
| C8  | T5402683   | 416.5     | C32 | T5277813   | 493.3     | C56  | T5589821   | 450.6     |
| C9  | T5459582   | 444.5     | C33 | T5278524   | 501.6     | C57  | T5621919   | 501.6     |
| C10 | T5528578   | 478.5     | C34 | T5282728   | 509.6     | C58  | T5623142   | 439.6     |
| C11 | T5578540   | 434.6     | C35 | T5294712   | 435.5     | C59  | T5753896   | 399.4     |
| C12 | T5762096   | 438.5     | C36 | T5319954   | 455.9     | C60  | T5754083   | 423.5     |
| C13 | T0503-6093 | 448.6     | C37 | T5333787   | 475.5     | C61  | T0503-7412 | 512.6     |
| C14 | T0504-0312 | 516.5     | C38 | T5352789   | 550.6     | C62  | T0511-0042 | 406.4     |
| C15 | T0507-8302 | 475.6     | C39 | T5354773   | 453       | C63  | T5236177   | 502.5     |
| C16 | T0510-3743 | 476.5     | C40 | T5368384   | 480.6     | C64  | T5243864   | 519.6     |
| C17 | T0510-3746 | 467.5     | C41 | T5399418   | 421.5     | C65  | T5251659   | 510.7     |
| C18 | T0510-3749 | 494.5     | C42 | T5399926   | 402.4     | C66  | T5302320   | 508.7     |
| C19 | T0513-4428 | 518       | C43 | T5402355   | 449.9     | C67  | T5326526   | 510.6     |
| C20 | T0515-1487 | 388.5     | C44 | T5422008   | 459.5     | *C68 | T5434998   | 456.5     |
| C21 | T0515-5982 | 418.5     | C45 | T5423152   | 444.5     | C77  | T5238027   | 474.5     |
| C22 | T0516-0241 | 448.6     | C46 | T5430247   | 476.5     | C78  | T6390116   | 473.5     |
| C23 | T0517-3760 | 444.9     | C47 | T5430740   | 418.5     | C79  | T6409992   | 471.5     |
| C24 | T0519-1883 | 477.6     | C48 | T5448953   | 434.6     | C80  | T6457230   | 473.6     |

\*Indicates break in tube #, compounds 69-76 were not analogs of 1E7-03 and were not included in the study.
