# Supplementary material
Source: PubMed Central journal article supplement (PMC6249606)
Supplement: jiy422_suppl_table_2.pdf [file jiy422_suppl_table_2.pdf]

## Supplemental Table 2

SPR data for several 1E7-03 analogues including C31.

| <b>Compound</b> | <b>Rmax (RU)</b> | <b>Chi<sup>2</sup></b> | <b>K<sub>D</sub></b> | <b>PP1</b>    |
|-----------------|------------------|------------------------|----------------------|---------------|
| C17             | 2.735            | 0.0767                 | 9.629E-7             | WT            |
| C25             | 16.6             | 0.419                  | 6.7E-6               | WT            |
| C25             | 3.5              | 2.84                   | 5.667E-6             | Triple mutant |
| C25             | 4.05             | 1.08                   | 9.97E-6              | Quad mutant   |
| C33             | 356              | 0.02                   | 1.412E-5             | WT            |
| C33             | 20.53            | 2.99                   | 1.3E-5               | Triple mutant |
| C33             | 22               | 2.62                   | 1.006E-5             | Quad mutant   |
| C34             | 6.1              | 0.16                   | 2.55E-5              | WT            |
| C34             | 6.7              | 0.26                   | 2.53E-5              | Triple mutant |
| C34             | 9.7              | 0.38                   | 6.671E-5             | Quad mutant   |
| C46             | 114.3            | 0.05                   | 3.245E-4             | WT            |
| C46             | 105.9            | 0.11                   | 2.756E-4             | Triple mutant |
| C46             | 141.1            | 0.16                   | 3.676E-4             | Quad mutant   |
| C31             | 13.96            | 0.254                  | 1.884E-6             | WT            |
| C31             | 66.3             | 1.5                    | 8.012E-6             | Quad mutant   |
| 1E7-03          | 4.9              | 0.006                  | 6.16E-6              | WT            |
| 1E7-03          | 3.5              | 0.05                   | 9.757E-6             | Triple mutant |
| 1E7-03          | 3.0              | 0.05                   | 9.042E-6             | Quad mutant   |
