# Supplementary material
Source: PubMed Central journal article supplement (PMC6249606)

# Supplemental Figure 2

## Scheme 1: Chemical synthesis of C31

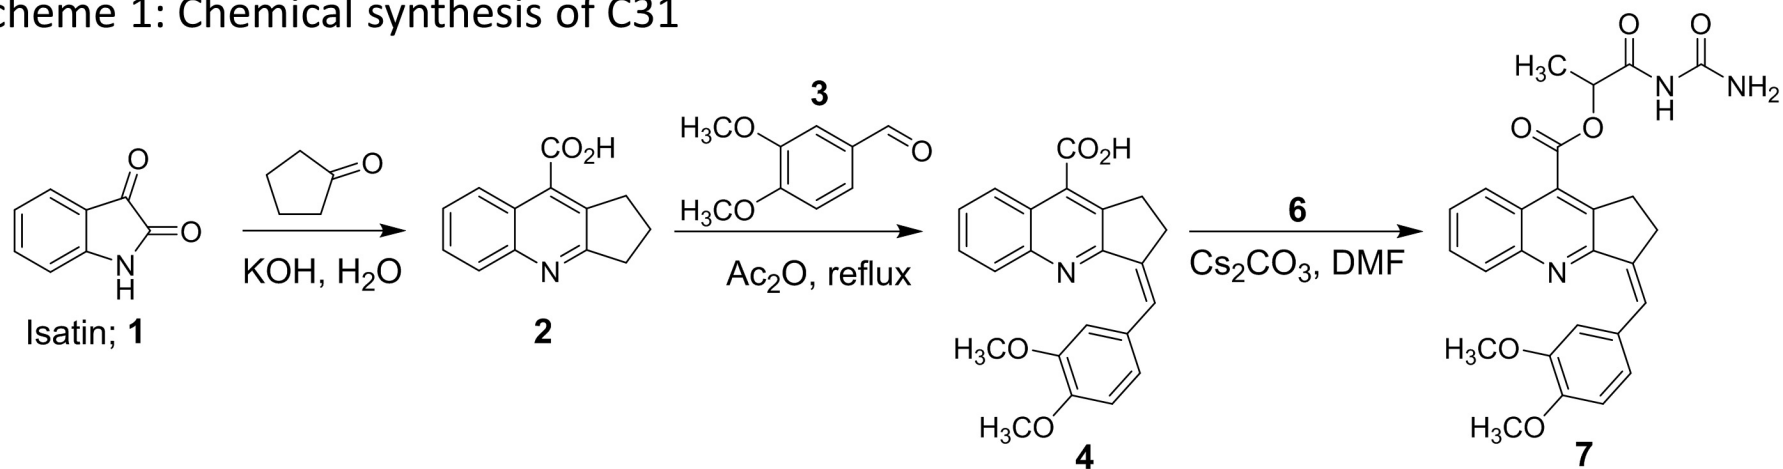

Supplement: jiy422_suppl_figure_2.pdf [file jiy422_suppl_figure_2.pdf]
